# Supplementary material for: Putting the “Self” in Self-Injury Research: Inclusion of People With Lived Experience in the Research Process
Source: Atypon-hosted journal article supplement (doi:10.1176/appi.ps.201800488), 2019-07-24
Supplement: appi.ps.201800488.ds001.pdf [file appi.ps.201800488.ds001.pdf]

Table 1. Specific strategies and considerations for involving people with lived experience of self-injury in research.

|                                |                                                                                                                                                                                                                                                                                                                                                                                                                                                                                                                                                                                                                                                                                                                                                                                                                                                                                                                                                                                                                                                                                                                                |
|--------------------------------|--------------------------------------------------------------------------------------------------------------------------------------------------------------------------------------------------------------------------------------------------------------------------------------------------------------------------------------------------------------------------------------------------------------------------------------------------------------------------------------------------------------------------------------------------------------------------------------------------------------------------------------------------------------------------------------------------------------------------------------------------------------------------------------------------------------------------------------------------------------------------------------------------------------------------------------------------------------------------------------------------------------------------------------------------------------------------------------------------------------------------------|
| <b>Initial Recruitment</b>     | <p>People with lived experience of self-injury are often keen to contribute to research and break down stigma. The approaches below may help when inviting individuals in the research process and during subsequent interactions:</p> <ul style="list-style-type: none"> <li>• Use existing professional groups to invite people with lived experience (e.g. American Association for Suicidology; Canadian Depression Research and Intervention Network; Western Australian Health Translation Network; INVOLVE).</li> <li>• Create specific lived experience components of relevant professional organisations (e.g., International Society for the Study of Self-Injury; American Association for Suicidology, International Association for Suicide Prevention).</li> <li>• Online self-injury communities are abundant and highly salient for many individuals with lived experience of self-injury. Posts can be made on relevant platforms to invite participation in research. Use of online chat and meeting software (e.g., Skype, Zoom, Webex) may permit follow-up and facilitate further involvement.</li> </ul> |
| <b>Involvement in Research</b> | <p>People with lived experience of self-injury can participate in all parts of the research process. Their involvement may be helpful in the following ways:</p> <ul style="list-style-type: none"> <li>• People with experience of self-injury can use their own experiences to guide priority driven research.</li> <li>• People with experience of self-injury can use their stories of stigma in the healthcare system to inform treatment provision and service delivery.</li> <li>• People with lived experience of self-injury are in a unique role to inform research design through consideration of the impact of research on participants (e.g., self-injury imagery may be triggering).</li> <li>• When conducting research, disclosures during interview studies may break down stigma and facilitate rapport.</li> <li>• Maximising the reach and impact of findings through involving individuals with lived experience in conferences and eliciting their viewpoints.</li> </ul>                                                                                                                               |
| <b>Ethical considerations</b>  | <p>Involvement in research may be upsetting or triggering for some people with a history of self-injury. The following considerations may help mitigate such risks:</p> <ul style="list-style-type: none"> <li>• In line with ethical guidelines, ensure clear communication regarding participant requirements from the outset <i>and</i> during the research process, provide community-based (local) and online resources to all participants, and employ mood augmentation or relaxation techniques to ensure participants are not upset upon completion of the study.</li> </ul> <p>People with lived experience can be reimbursed for their time in a number of ways. The INVOLVE guidelines in the UK (see below) outline different levels of remuneration depending on the level of involvement.</p>                                                                                                                                                                                                                                                                                                                   |
| <b>Helpful Resources</b>       | <p>Resources to be consulted/adapted for involving people with lived NSSI experience in research:</p> <ul style="list-style-type: none"> <li>• INVOLVE: <a href="http://www.invo.org.uk">www.invo.org.uk</a></li> <li>• American Association for Suicidology: <a href="http://www.suicidology.org">www.suicidology.org</a></li> <li>• Canadian Depression Research and Intervention Network: <a href="http://www.cdrin.org">www.cdrin.org</a></li> <li>• Recovery-oriented mental health services: <a href="http://www.health.gov.au">www.health.gov.au</a></li> <li>• BC SUPPORT Unit (<a href="http://bcsupportunit.ca">bcsupportunit.ca</a>)</li> </ul> <p>Resources to provide to individuals with lived NSSI experience:</p>                                                                                                                                                                                                                                                                                                                                                                                              |

|  |                                                                                                                                                                                                                                                                                                                                                                                                                         |
|--|-------------------------------------------------------------------------------------------------------------------------------------------------------------------------------------------------------------------------------------------------------------------------------------------------------------------------------------------------------------------------------------------------------------------------|
|  | <ul style="list-style-type: none"><li>• Self-injury Outreach &amp; Support: <a href="http://www.sioutreach.org">www.sioutreach.org</a></li><li>• Shedding Light on Self-injury: <a href="http://www.self-injury.org.au">www.self-injury.org.au</a></li><li>• Self-injury and Recovery Research and Resources:<br/><a href="http://www.selfinjury.bctr.cornell.edu">http://www.selfinjury.bctr.cornell.edu</a></li></ul> |
|--|-------------------------------------------------------------------------------------------------------------------------------------------------------------------------------------------------------------------------------------------------------------------------------------------------------------------------------------------------------------------------------------------------------------------------|
